# Supplementary material
Source: PubMed Central journal article supplement (PMC4534675)
Supplement: IAI.00574-15_zii999091377so1.pdf [file IAI.00574-15_zii999091377so1.pdf]

## 1 **Supplemental Information**

### 2 **Supplemental Results**

#### 3 **Establishment and quality control of the multiplex gene expression pipeline for** 4 **the measurement of localization-dependent gene expression fingerprints**

5 We aimed for establishment and control of a robust data analysis pipeline to assess  
6 multiplex qPCR data for small bulk cell populations and for single cells (1).  
7 Prerequisite to qPCR analysis of bulk cells is accurate normalization using an internal  
8 control with constant expression values, independent of experimental conditions.  
9 Since no such universal control gene exists, identification and verification of several  
10 candidate genes is of utmost importance (2). Out of eleven potential reference genes,  
11 *B2M* and *PGK1* were selected as reference genes in HeLa cells. The choice was based  
12 on low variance of expression over all conditions (Fig. S3a, left), expression levels in-  
13 range with those of selected genes (Fig. S3a, right) and robust regression coefficients  
14 of CT values (Fig. S3b) both at the level of small bulk cell populations and of single  
15 cells.

16 For each experiment, we ran multiple gene expression arrays, each corresponding to  
17 infection with WT or one of five *Shigella* mutants. In order to assess their  
18 comparability, the cDNA from the same uninfected control samples was applied to all  
19 arrays within one experiment, and both their bulk cell CTs ( $CT_{bc}$ ) and single cell CTs  
20 ( $CT_{sc}$ ) were used to test the inter-chip variance (Fig. S3c, left and right, respectively).  
21 Only experiments that showed small differences ( $\pm 1$  CT) of  $\Delta CT_{bc}$  and  $CT_{sc}$  from  
22 median values were used for further analysis.

23 Next, we aimed at controlling the experimental conditions and assuring  
24 reproducibility. Assessing the impact of CCF4 treatment on transcriptional signatures

25 by PCA revealed a diffuse, non-separable distribution of unloaded and CCF4-loaded  
26 cells, indicating no global impact of CCF4 on gene expression (Fig. S3d).

27 To stop infection and enzymatic activities of transcription, as well as to preserve the  
28 overall availability of mRNA, cells were shifted to, and further processed on, ice.  
29 Intact living single cells were directly sorted into lysis buffer. PCA showed that  
30 transcriptional signatures of *Shigella*-infected cells strongly separate from uninfected  
31 cells along the first PC axis, indicating significantly different gene expression  
32 signatures activated upon bacterial challenge (Fig. S3e). Furthermore, cells sorted  
33 immediately (0 h) or only after a delay on ice of 1 h or 2 h, yielded non-separable data  
34 points, indicating that this had no global impact on gene expression profiles (Fig.  
35 S3e). This suggests that both transcription and infection were stalled at 4°C.

36 In addition, the homogeneity of the results originating from multiple independent  
37 experiments demonstrates the sensitivity and reproducibility of our analytical  
38 approach (Fig. S3).

39

#### 40 **Quality assessment of single cell analysis**

41 In order to rule out detection biases between lowly and highly expressed genes, we  
42 examined the concordance between the average  $CT_{bc}$  (obtained from 20 cells) and  
43 their corresponding cumulative  $CT_{sc}$  ( $cCT_{sc}$ ), a computed CT value corresponding to  
44 the sum of expression from 20 single cells. Two out of three independent experiments  
45 showed that for low  $cCT_{sc}$ , deviations from  $CT_{bc}$  were in the order of magnitude of  
46 technical noise ( $\pm 1$  CT), whereas high  $cCT_{sc}$  of poorly expressed genes strongly  
47 diverged from  $CT_{bc}$ , most likely due to low signal-to-noise ratios in the single cell  
48 expression measurements (Fig. S7a). To distinguish between valid and potentially  
49 non-specific, low expression measurements, and thus to maximize global concordance

50 between single and bulk cell measurements, a cutoff ( $CT_{max}$ ) was defined, above  
51 which all CTs were regarded as non-expressed (see Experimental Procedures). To this  
52 end, two global measures of concordance, the absolute mean difference between  $CT_{bc}$   
53 and the  $cCT_{sc}$  (red line) and the average root mean square deviation (RMSD) (blue  
54 line) were evaluated for a range of CT cutoffs (Fig. S7b). This revealed a  $CT_{max}$  of 23  
55 to yield globally optimal concordance (Fig. S7b). Applying this cutoff retained valid  
56 measurements for 90.5% of all gene-stage pairs (green line) and 82 out of 96 genes  
57 showed only moderate deviations between the  $cCT_{sc}$  and  $CT_{bc}$  ( $RMSD \leq 1.5$ ). To  
58 further investigate the behavior of genes, for which the  $cCT_{sc}$  showed low  
59 concordance with  $CT_{bc}$ , two types of box plots were generated. The first displays the  
60 differences between the  $cCT_{sc}$  and  $CT_{bc}$  on a per-gene basis for all infection stages  
61 (Fig. S7c). The second plot shows  $cCT_{sc}$  values overlaid on their corresponding bulk  
62 cell measurements (Fig. S7d). Most of the poorly concordant genes were pro-  
63 inflammatory genes, such as *TNF $\alpha$* , *HBD3*, *IL-8* and *CCL20*, whose deviance from  
64 the bulk cell data was often restricted to individual infection stages (e.g. *IL-8*, Fig.  
65 S7d). Taken together, applying a  $CT_{max}$  of 23 removed low, non-specific single cell  
66 expression measurements, while still allowing analysis of ~90% of the investigated  
67 genes.

68

## 69 **Supplemental Materials and Methods**

70

### 71 **Cell culture, infection experiments and imaging of Caco-2 TC7 cells**

72 Intestinal epithelial Caco-2 TC7 cells (kindly provided by P. Sansonetti) were grown  
73 in DMEM supplemented with 10% decompemented FCS, 1% HEPES, 1% non-  
74 essential amino acids and 1% penicillin/streptomycin (100 U/ml and 100 µg/ml,  
75 respectively) at 37°C and 10% CO<sub>2</sub>. For experimentation with polarized epithelial  
76 cells, 10<sup>6</sup> cells were seeded onto 6-well polyester membrane transwell inserts (8 µm  
77 pore size, Corning) and grown upside down for 14 days with medium replacement  
78 every 2-3 days (Fig. S4c). To control polarization, the transepithelial resistance (TER)  
79 was surveyed and transcriptional profiles of differentiated (TER>700 Ohm/cm<sup>2</sup>) and  
80 non-differentiated cells were compared (Fig. S4d). For the FRET assay, transwells  
81 were washed 3x with PBS and loaded with 0.25 µM CCF4/AM substrate (Invitrogen)  
82 on both sides of the transwell inserts. For basolateral infection, transwell plates  
83 containing bacteria at a MOI 75 in the insert were spun for 5 min at 200 x g and 37°C  
84 to facilitate transmembrane migration of bacteria and were further incubated for 25  
85 min at 37°C to promote bacterial invasion. Subsequently, cells were extensively  
86 washed and further incubated for 2.5 h at 37°C.

87 For imaging of Caco-2 cells, both sides of the inserts were fixed in 4% PFA for 30  
88 min, incubated in PBS/1% BSA for 30 min at RT and stained with anti-villin antibody  
89 (Abcam) for 1 h at RT, followed by 1 h incubation at RT with anti-mouse FITC-  
90 conjugated antibody (Jackson). Subsequently, membranes were mounted on cover  
91 slides using ProlongGold anti-fading kit (Invitrogen) containing DAPI to stain nuclei.  
92 Microscopic imaging was performed on a Spinning disc microscope (Perkin Elmer)  
93 using a 40x objective with excitation at 405 nm (for DAPI), 488 nm (for Villin) and  
94 561 nm (for dsRed *Shigella*). Images of 23 confocal sections were acquired at 1 µm

95 intervals using a Hamamatsu C9100-50 camera and were further processed by  
96 maximum projection using the Volocity software (Perkin Elmer).

97

## 98 **Imagestream**

99 For Imagestream analysis, cells were trypsinized and fixed in 4% PFA for 30 min and  
100 then resuspended in PBS. High-throughput multispectral fluorometric technology was  
101 used to control and verify FACS-based analysis with microscopic images using the  
102 imaging flow cytometer (ImageStream ISX, Amnis Corporation, Seattle, WA). For  
103 each sample, 15,000 – 25,000 cells were imaged and data were analyzed using the  
104 manufacturer's software (IDEAS, Amnis Corporation). Briefly, fluorometric  
105 compensation was digitally calculated based on single-stain controls. Focused single  
106 cells were selected based on the digital plot of aspect ratio, area and gradient of the  
107 bright field images. Distinct populations of cells were identified based on the  
108 fluorescence signals and the spot count algorithm was used to identify attached or  
109 internalized bacteria.

110

## 111 **Extended Information on single cell data processing and analysis**

112 **Estimation of a specific expression threshold.** In order to assess concordance of  
113 single and bulk cell measurements, we aimed at comparing the average expression  
114 value of bulk cells ( $CT_{bc}$ ) and the sum of expression values of single cells, the so-  
115 called cumulative single cell CT ( $cCT_{sc}$ ). To compute  $cCT_{sc}$ , non-normalized,  $CT_{sc}$   
116 were transformed into expression threshold (ET) values by subtracting them from a  
117 given maximal specific CT value ( $CT_{max}$ ), added up to create an *in silico* pool and  
118 finally transformed back into CT space (3). To determine  $CT_{max}$ , a cutoff, above which  
119 all  $CT_{sc}$  measurements exceeding that threshold will be discarded, a range of CT

120 values between 20 and 40 was tested. To this end, two measures of concordance were  
 121 applied: the mean difference between  $cCT_{sc}$  and  $CT_{bc}$  over all infection stages and the  
 122 RMSD.

$$123 \quad \text{RMSD} = \sqrt{\frac{1}{n} \sum_{i=1}^n (cCT_{sc}(i) - \text{mean}(CT_{bc}(i)))^2}, \quad n: \text{number of measured conditions}$$

124 To determine a  $CT_{max}$  yielding the best global concordance between single cell and  
 125 bulk cell data, the mean difference and RMSD were averaged over all genes in the  
 126 combined data set. Fig. S6b demonstrates that at a cutoff  $CT_{max}$  of  $23 \pm 0.02$ , both  
 127 measures attained optimal values, while retaining 90.5% of all measured gene-stage  
 128 pairs (Fig. S7b). Thus, all subsequent single cell analysis was based on ET values  
 129 computed using a cutoff  $CT_{max}$  of 23.

130

131 **Differential expression analysis.** In the likelihood ratio test (LRT), the mean  
 132 expression ( $\mu$ ) and proportion ( $\pi$ ) of single cells expressing a given gene are  
 133 simultaneously compared and the goodness-of-fit of two alternative models to the  
 134 measured data is determined (4). In the null model, parameters  $\mu$  and  $\pi$  are jointly  
 135 estimated. The alternative model estimates separate parameter values for the two  
 136 experimental units to be compared (i.e. two stages of infection). Goodness-of-fit of  
 137 the two models is individually evaluated by the likelihood function:

$$138 \quad L(\theta | y, v) = \prod_k \pi_k^{n_k} (1 - \pi_k)^{I - n_k} \prod_{i \in S_k} g(y_{ik} | \mu_k, \sigma^2)$$

139  $y$  and  $v$  are the vectors of ET values for a given gene across the two groups,  $\theta$  is the vector of  
 140 parameters to be fitted to the data,  $S_k$  is the set of cells expressing the gene in group  $k$  (i.e.  $S_k = \{i : v_{i,k}=1\}$ ),  $n_k = \sum_i v_{i,k}$  is the number of cells expressing the gene in group  $k$  and  $g$  is the density function of  
 141 the log-normal distribution with parameters  $\mu_k$  and  $\sigma^2$ .

143

144 The LRT statistic is defined by the ratio of the likelihoods of the null and alternative  
 145 model. It asymptotically follows a  $\chi^2$  distribution with two degrees of freedom under  
 146 the null hypothesis (5), which allows the computation of p-values for differential  
 147 expression.

148

149 **Gene-pair correlation analysis.** We computed Spearman's rank correlation  
 150 coefficients over the 20 measured ET values for all pairs of genes in a given  
 151 experiment  $e$  and infection stage  $s$ :

$$152 \quad c_{e,s}(g_i, g_j) = \rho(ETs_{e,s}(g_i), ETs_{e,s}(g_j))$$

153 To assess significance of these correlations, we compared them to a background set of  
 154  $N_B=10,000$  correlations computed over randomly permuted orderings of the 20 ET  
 155 values and defined an empirical p-value:

$$156 \quad P_{e,s}(g_i, g_j) = \left( \sum_{b=1}^{N_B} I(c_{e,s}(g_i, perm_b(g_j)), c_{e,s}(g_i, g_j)) + 1 \right) / N_B + 1, \text{ with}$$

$$I(c_1, c_2) = \begin{cases} 1, & \text{if } \text{abs}(c_1) \geq \text{abs}(c_2) \\ 0, & \text{otherwise} \end{cases}$$

157 Gene-pair correlations and significances of the two retained experiments were  
 158 aggregated into a combined correlation  $c_{\text{comb}}$  and p-value  $P_{\text{comb}}$  (Fig. S6e):

$$159 \quad c_{\text{comb}_s}(g_i, g_j) = \begin{cases} \sum_{e=1}^2 c_{e,s}(g_i, g_j) / 2 & \text{if } \text{sign}(c_{1,s}(g_i, g_j)) = \text{sign}(c_{2,s}(g_i, g_j)) \\ c_{\text{arg min}_e(P_{e,s}(g_i, g_j)), s}(g_i, g_j) & \text{otherwise} \end{cases}$$

$$P_{\text{comb}_s}(g_i, g_j) = \begin{cases} \prod_{e=1}^2 P_{e,s}(g_i, g_j) & \text{if } \text{sign}(c_{1,s}(g_i, g_j)) = \text{sign}(c_{2,s}(g_i, g_j)) \\ P_{\text{arg min}_e(P_{e,s}(g_i, g_j)), s}(g_i, g_j) & \text{otherwise} \end{cases}$$

160 **Pathway correlation analysis.** Based on these measures, we evaluated the degree of  
 161 correlation within common response pathways, i.e. pro-inflammation, apoptosis and  
 162 stress (see list at the end of this section). The degree of correlation  $c_{sum}$  between genes  
 163 within a pathway  $pw$  at a given infection stage  $s$  was defined as follows:

$$164 \quad c_{sum_s}(pw) = \sum_{i,j \in pw, i \neq j} -\log(P_{comb_s}(g_i, g_j))$$

165 A score for changes in the  $c_{sum}$  values between different infection stages was defined  
 166 as follows:

$$167 \quad \Delta c_{sum_{pw}}(s_1, s_2) = c_{sum_{s_1}}(pw) - c_{sum_{s_2}}(pw)$$

168 To assess significance of these changes, we compared them against an empirical  
 169 background distribution based on randomly drawn pseudo-pathways and defined a  
 170 statistic  $t$  as detailed in the following pseudo-code:

```

NPseudoPathways = 200
NRuns = 50
empPs = ()

# compare deltaCsum(pw,s1,s2) to values obtained on random pseudo - pathways
for ( n in NRuns ) {
  171   pps = drawPseudoPathways( NPseudoPathways )
   deltaCsBg = ()
   for ( pp in pps ){
     append( deltaCsBg , deltaCsum(pp,s1,s2) )
   }
   append( empPs , (sum(deltaCsBg >= deltaCsPw) +1) / (NPseudoPathways +1) )
}
mu = mean(empPs)
sigma = sd(empPs)

# define summary statistic t
if ( mu + sigma < 0.05 )
  t = 3
elif ( mu < 0.05 )
  t = 2
elif ( mu - sigma < 0.05 )
  t = 1
else
  t = 0

```



172 Pseudo-pathways were drawn with gene expression levels and size matching the  
173 respective pathway of interest. *t* scores for significant decrease of correlation were  
174 computed analogously and assigned values from -3 to 0.

175

176 **List of gene sets used for pathway correlations.**

177 **Pro-inflammation:** *IL-8, TNF $\alpha$ , IFN $\alpha$ 14, IFN $\beta$ , IL-6, HBD3, CCL2, CCL20, CXCL-*  
178 *1, CXCL-2, IL-18, CXCL10, NFKBIA, NFKBIE, NFKB1, NFKB2, c-Jun, COX2*

179 **Apoptosis:** *IFN $\beta$ , TNFAIP3, Bnip3, RELA, CLARP2, Birc2, Birc3, TNFAIP8,*  
180 *BECN1, Gadd45 $\alpha$ , XRCC5, NF $\kappa$ B1, JUNB, CHOP, CYR61*

181 **Stress response genes:** *CHOP, ATF3, Xbp1, CDKN1A, IL-8, IL-6, IFN $\beta$ , NFKBIE,*  
182 *COX-2, CCNE1, CCNA2, CCNB1*

183

184

185 **Supplemental Figures**

186

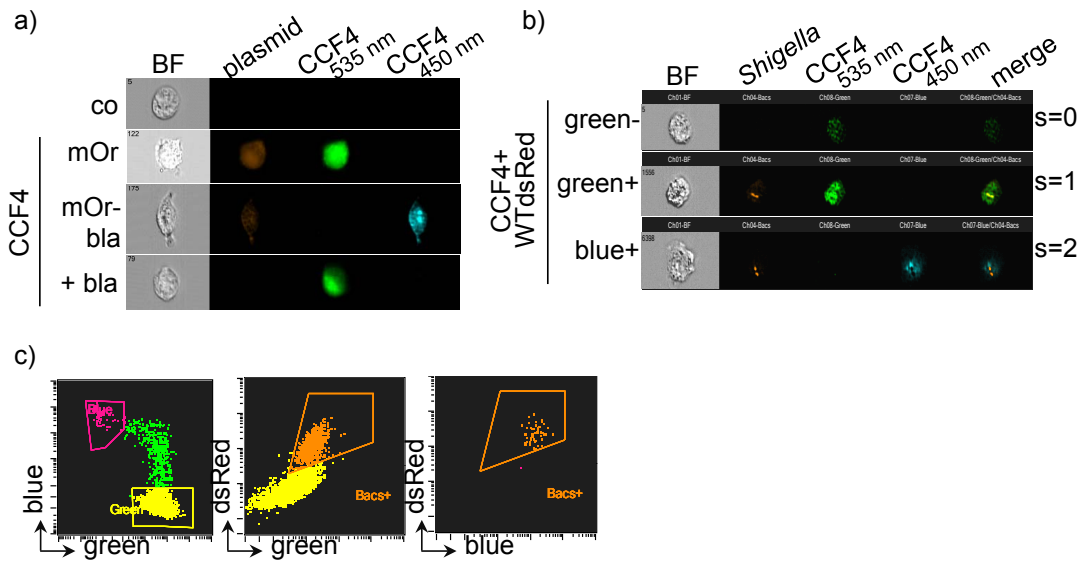

187

188 **Figure S1 (relates to Fig. 1a) Image stream analysis of different stages of**  
 189 **bacterial infection**

190 The compatibility of the CCF4/ $\beta$ -lactamase assay for discrimination and accurate  
 191 purification of bacterial infection stages via a FACS-based methodology was tested  
 192 using the Imagestream (ISX). 10,000 HeLa cells were analyzed in the indicated bright  
 193 field (BF) and fluorescence channels. a) HeLa cells were left untreated, transfected  
 194 with an empty (mOr) or a  $\beta$ -lactamase- and mOrange-containing (mOr-bla) plasmid  
 195 to obtain cytosolic expression of  $\beta$ -lactamase or treated with soluble  $\beta$ -lactamase  
 196 (+bla) to exclude de-FRET upon extracellular presence of  $\beta$ -lactamase. CCF4 was  
 197 loaded where indicated. b) To discriminate stages of infected cells, CCF4-loaded cells  
 198 were infected with dsRed-fluorescent WT *Shigella* at a MOI 25 for 1 h. The number  
 199 of intracellular bacteria (s) was determined using the Amnis software's spot count  
 200 tool. c) Cells were appropriately gated and analyzed using the ISX dot plot tool.

201

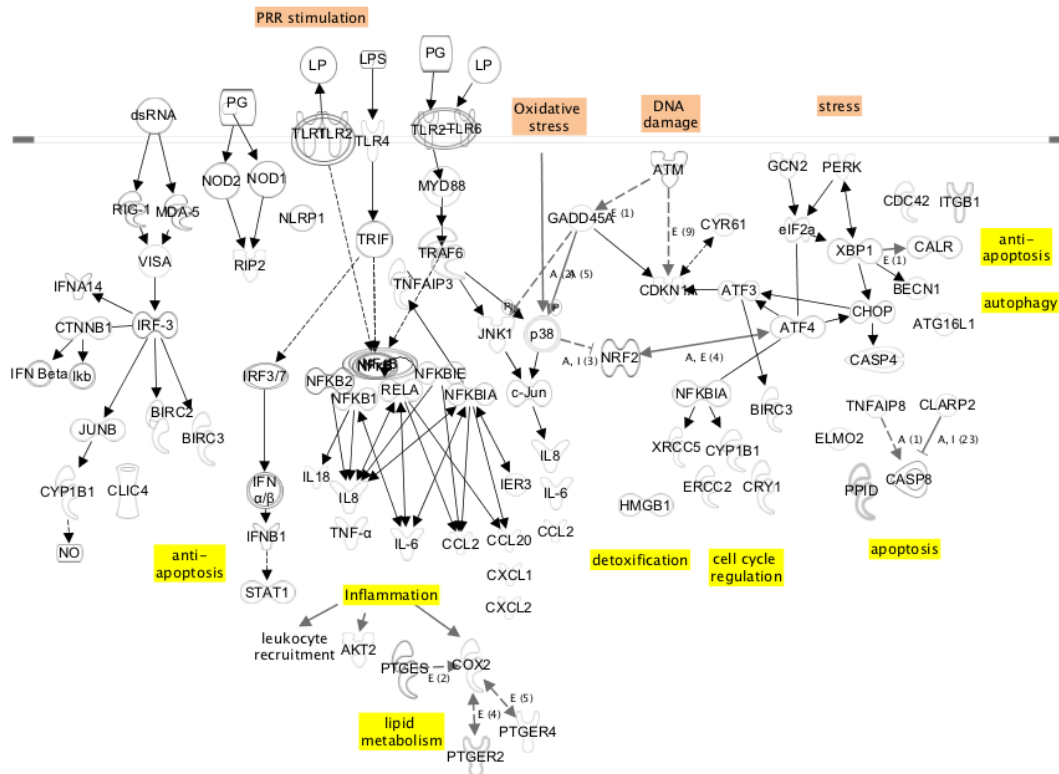

202

203 **Figure S2 (relates to Fig. 1) Ingenuity pathway network of selected genes**

204 Overview of the molecular signaling pathways linked with the selected genes for  
 205 the transcriptional analysis of HeLa cells. The overview was created using the  
 206 “pathway tool” of the IPA program. Continuous and dashed arrows indicate direct or  
 207 indirect interactions, respectively. Only interactions leading to transcriptional  
 208 activation or expression are shown.

209

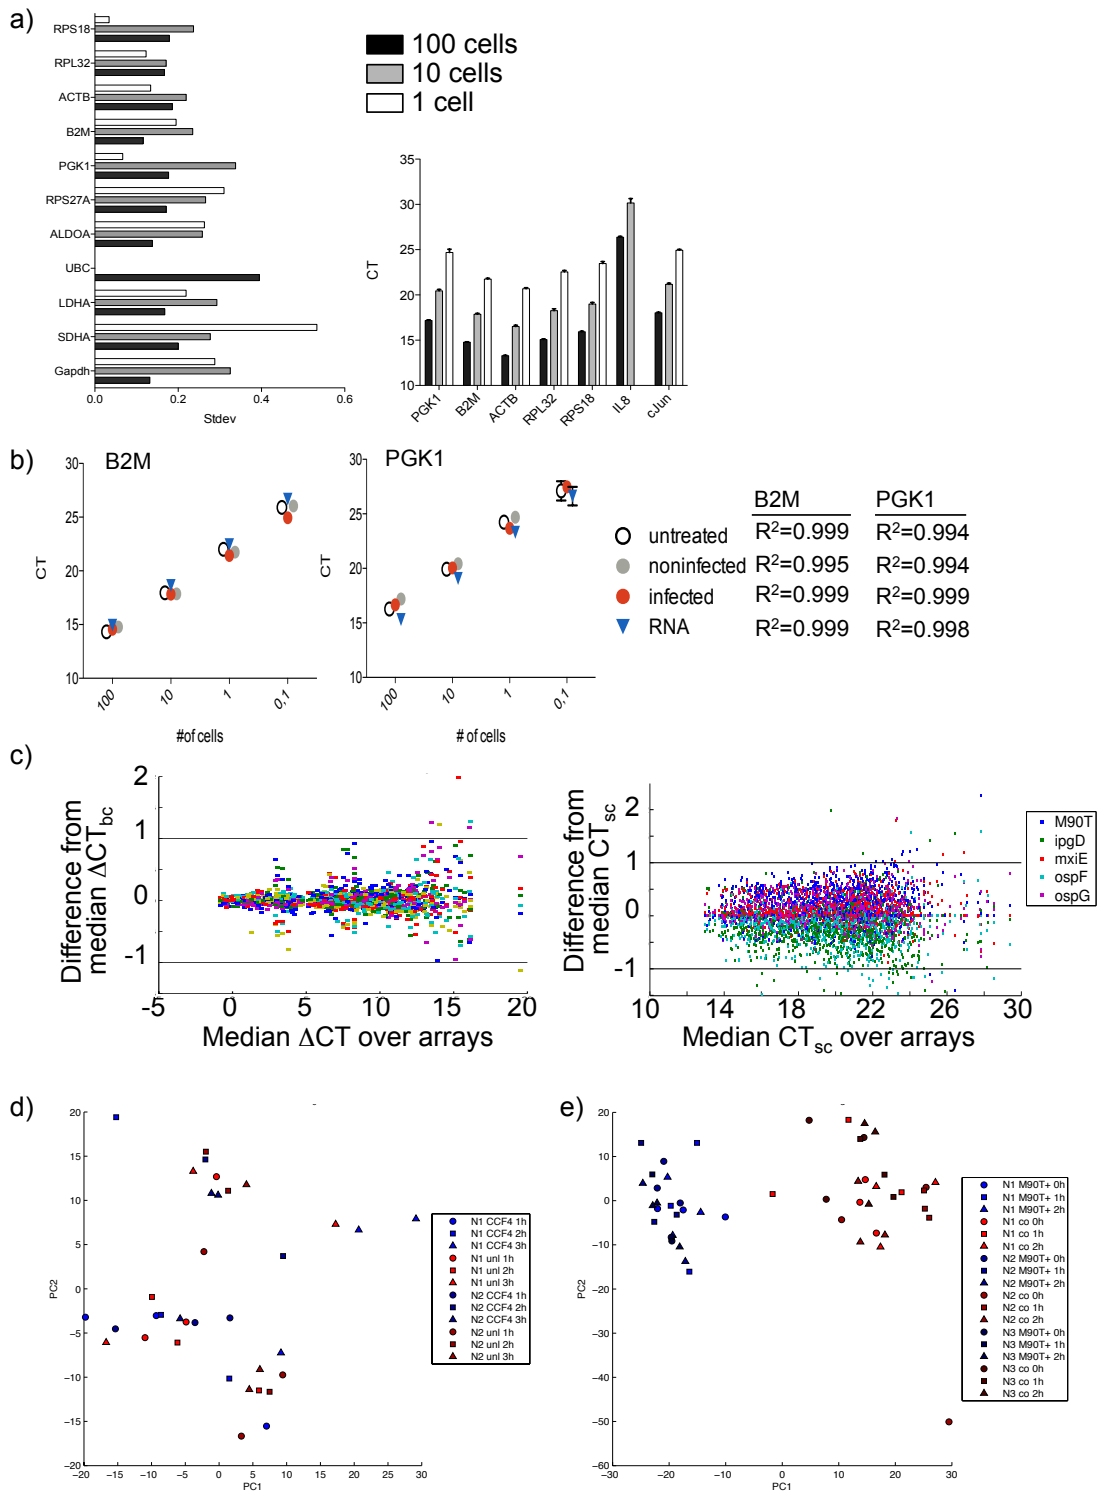

210

211 **Figure S3 (relates to Fig. 1) Establishment of a robust protocol for multiplex**  
 212 **transcriptional analysis of bulk and single cells**

213 a,b) Choice of two (*B2M* and *PGK1*) out of eleven reference genes (see also

214 supplemental results text). 150 ng RNA of either sorted untreated, uninfected or WT

215 *Shigella*-infected cells or of commercial HeLa RNA were reverse-transcribed and pre-  
216 amplified with 18 cycles. cDNA was titrated to obtain concentrations equivalent to  
217 100, 10, 1 and 0.1 cell(s) per volume of cDNA (2.9  $\mu$ l) and applied to the dynamic  
218 array (Biomark). Samples were run in triplicates and obtained CT values were  
219 quality-controlled as described in the experimental procedures. a) The variance of  
220 eleven potential reference genes was assessed by plotting the standard deviations  
221 (Stdev) of mean CT values (left). The five genes that showed the least variance were  
222 further tested for suitable expression levels in range with weakly (*IL-8*) and highly (*c-*  
223 *Jun*) expressed genes from our panel by plotting the CT + Stdev values of uninfected  
224 samples from indicated titrations (right). b) To investigate correlation coefficients  
225 ( $R^2$ ), the CT values for *B2M* and *PGKI* from indicated samples were plotted against  
226 the equivalent number of cells.

227 c) Since transcriptional analysis was performed on multiple arrays within one  
228 experiment, control samples from the same experiment were repeatedly re-run on all  
229 arrays in order to assess their comparability across arrays. Therefore, the difference of  
230 normalized  $\Delta CT_{bc}$  values (left) or of non-normalized  $CT_{sc}$  values (right) obtained from  
231 all control samples was plotted against the corresponding median expression over the  
232 arrays. While the plot shows only expression of control samples, arrays are labeled  
233 according to the *Shigella* strain used for infection of their other samples, i.e. as M90T  
234 WT,  $\Delta mxiE$ ,  $\Delta ipgD$ ,  $\Delta ospF$ ,  $\Delta ospG$ .

235 d) CCF4 loading has no global impact on gene expression profiles. PCA of unloaded  
236 (unl, red symbols) and CCF4-loaded (CCF4, blue symbols) cells incubated for further  
237 1 h (circles), 2 h (squares) and 3 h (triangles) at 37°C after removal of CCF4 from the  
238 cells and washing. Samples of two independent experiments (N1, N2) were run in  
239 triplicates.

240 e) Temperature shift to and further incubation of cells at 4°C stalled transcription.  
241 Samples were sorted immediately (+0 h circles), or kept on ice for further 1 h  
242 (squares) or 2 h (triangles) before sort. PCA shows transcriptional information of  
243 untreated (co, red symbols) and WT *Shigella*-infected (M90T, blue symbols) cells  
244 obtained from three independent experiments (N1, N2, N3) run in triplicates.  
245

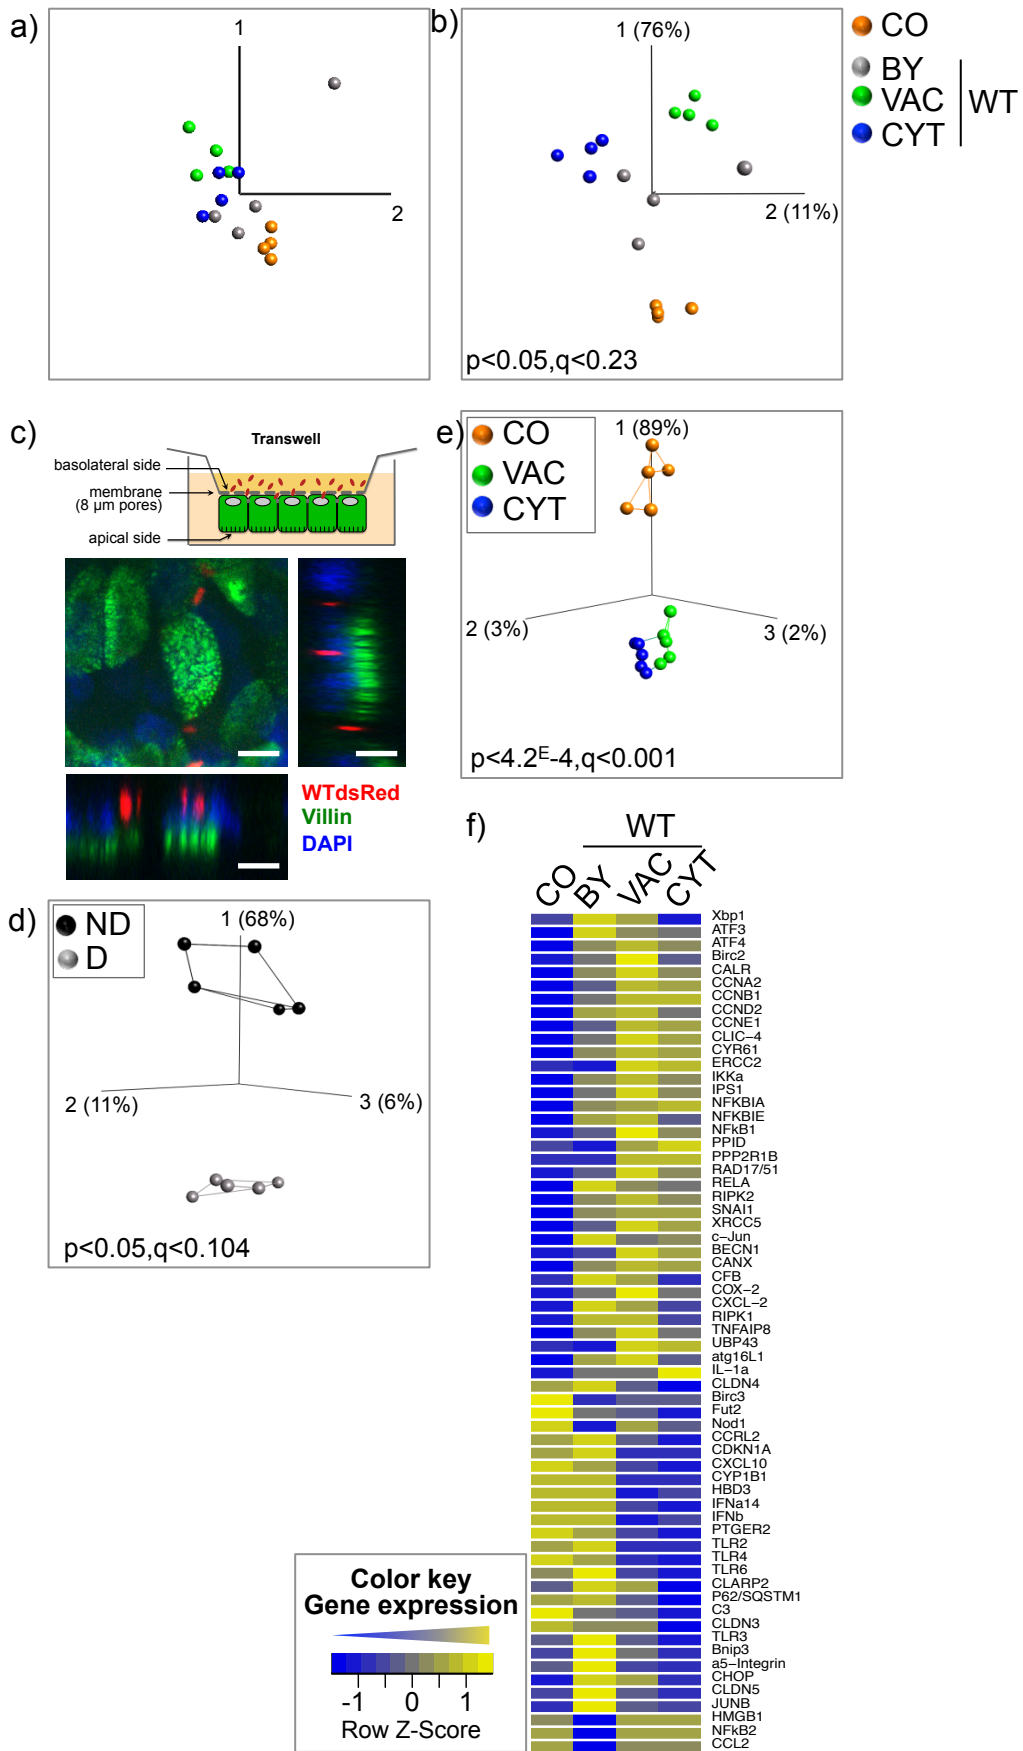

247 **Figure S4 (relates to Fig. 1) Localization-dependent transcriptional signatures of**  
248 **WT *Shigella*-infected HeLa and polarized Caco-2 cells**

249 a and b) PCA plots (corresponding to S2 and 3 Movies, respectively) of  
250 transcriptional signatures of bulk cells (dots) at indicated infection stages (BY, VAC,  
251 CYT) of WT *Shigella* infection and of a non-infected control (CO). No (a) or  
252 indicated cutoffs for p- and q-value (b) were applied.

253 c) Upper panel: Infection model of basolateral bacterial infection of Caco-2 TC7 cells  
254 with dsRed-expressing WT *Shigella* using Transwell plates (see details in Suppl. Exp.  
255 Procedures). Lower panel: Maximum projection of confocal images of polarized  
256 Caco-2 cells infected with dsRed-fluorescent WT *Shigella* at 3 h p.i. showing villi  
257 (green) at the apical side and nuclei (blue). Orthogonal (top left), xz (bottom left) and  
258 yz (top right) view, scale bar 10  $\mu$ m.

259 d,e) PCA plots of bulk cell transcriptional signatures (dots) of non-differentiated (ND)  
260 and differentiated (D) Caco-2 cells (d) or of differentiated Caco-2 cells at indicated  
261 infection stages (VAC, CYT) of *Shigella* WT-infected and of non-infected control  
262 (CO) cells (e). Connections between the two nearest neighbors (lines) and percentages  
263 of the captured variability by each PC are shown. Representative data from one out of  
264 three independent experiments are shown.

265 f) Heat map shows median  $\Delta$ CT values of bulk cell samples of Caco-2 cells  
266 transformed into a Row Z-score of indicated genes at indicated conditions of *Shigella*  
267 WT infection (BY, VAC, CYT) or uninfected control (CO). All genes with at least  
268 one significant gene expression change at one of the conditions are shown. The color  
269 key indicates the row Z-scores ranging from +2 (high expression, yellow) to -2 (low  
270 expression, blue). Data from two independent experiments at a p-value cutoff of 0.05  
271 are shown.





278 expression changes at the indicated transitions from one stage of bacterial infection to  
279 another, i.e. CO→BY→VAC→CYT (represented by blue rectangles). This yields a  
280 theoretical maximum of 34 possible profiles (represented by rounded squares or only  
281 summarized by numbers in brackets). Decisions were made based on whether a  
282 significant increase (orange arrows), decrease (blue arrows) or no significant change  
283 (grey arrows) of gene expression was detected. Orange symbols represent profiles to  
284 which experimentally identified signatures could be assigned. Profiles 6a and b were  
285 pooled, as the outcome (decrease only upon cytosolic localization) is identical. Grey  
286 symbols represent profiles to which no signatures could be assigned.

287 b) Summary of profile 0 to which genes were assigned that showed no significant  
288 change at the transition of the indicated stages upon WT *Shigella* infection. The box  
289 plot shows  $\Delta$ CT values of quadruplicates of bulk cell samples from two independent  
290 experiments for *IFN $\beta$* . Median expression value (red) as well as the 25% and 75%  
291 quartiles (boxes) are shown. Significances: Mann-Whitney U test with \*p<0.05,  
292 \*\*p<0.005, \*\*\*p<0.001, otherwise not significant.

293

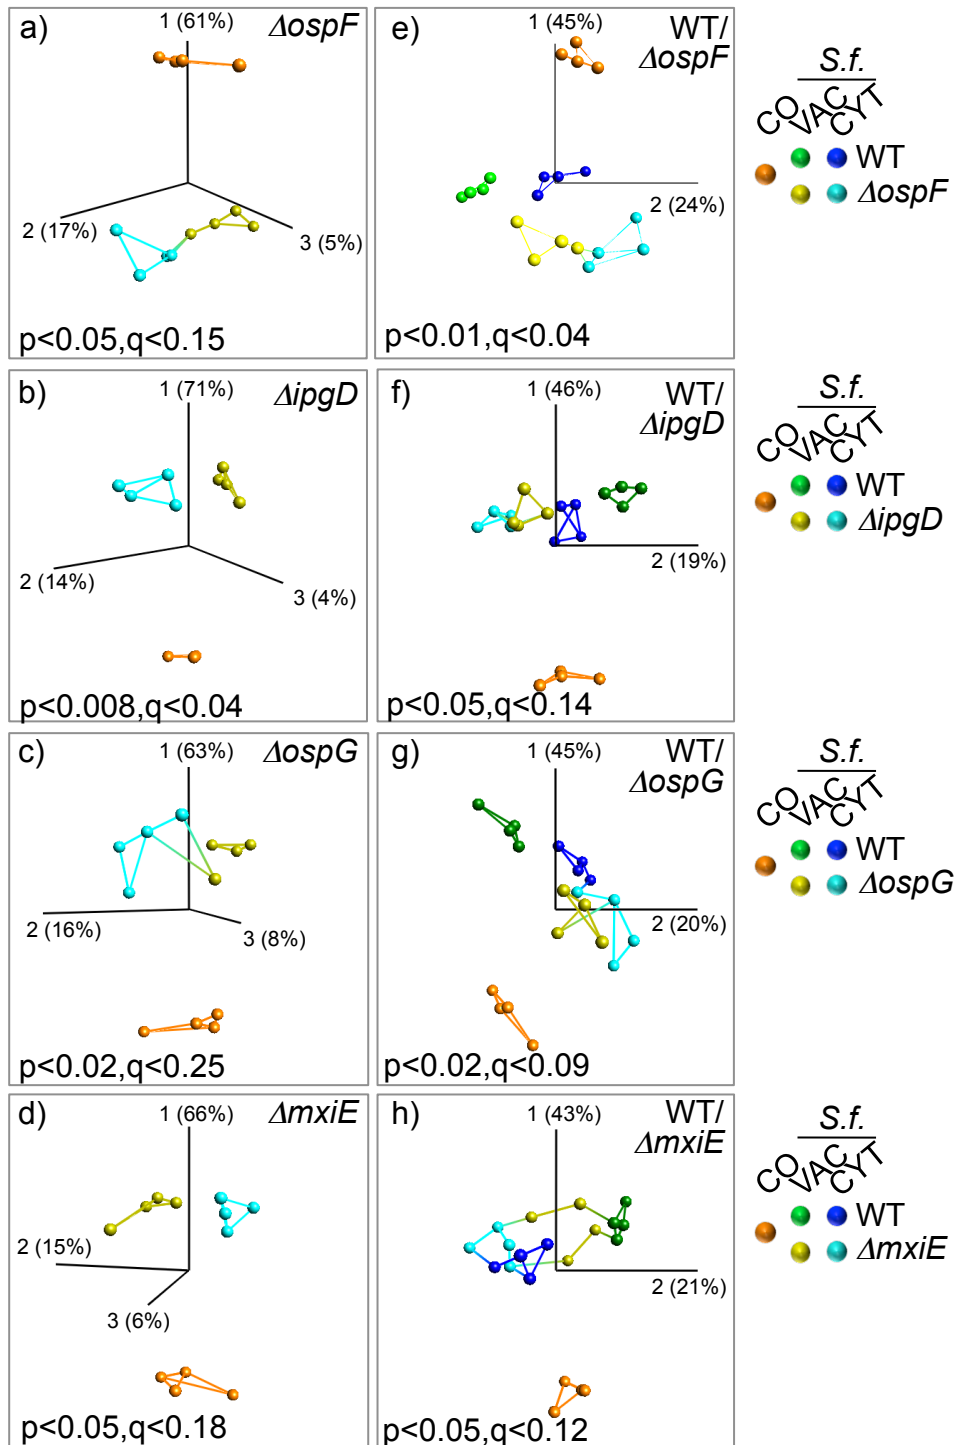

299 *ΔipgD*, c) *ΔospG*, d) *ΔmxiE Shigella*. Cutoffs for p- and q-values and nearest neighbor  
300 connections (lines) are shown.

301 e-h) PCA plots show bulk cell transcriptional signatures (dots) of cells infected with  
302 WT or with e) *ΔospF*, f) *ΔipgD*, g) *ΔospG*, h) *ΔmxiE Shigella* at the vacuolar or the  
303 cytosolic stage (VAC, CYT) and of non-infected control (CO) cells. The two nearest  
304 neighbor connections (lines) at indicated cutoffs for p- and q-value are shown. All  
305 PCA plots show data from one out of three independent experiments and correspond  
306 to Movies S5-8, respectively.

307

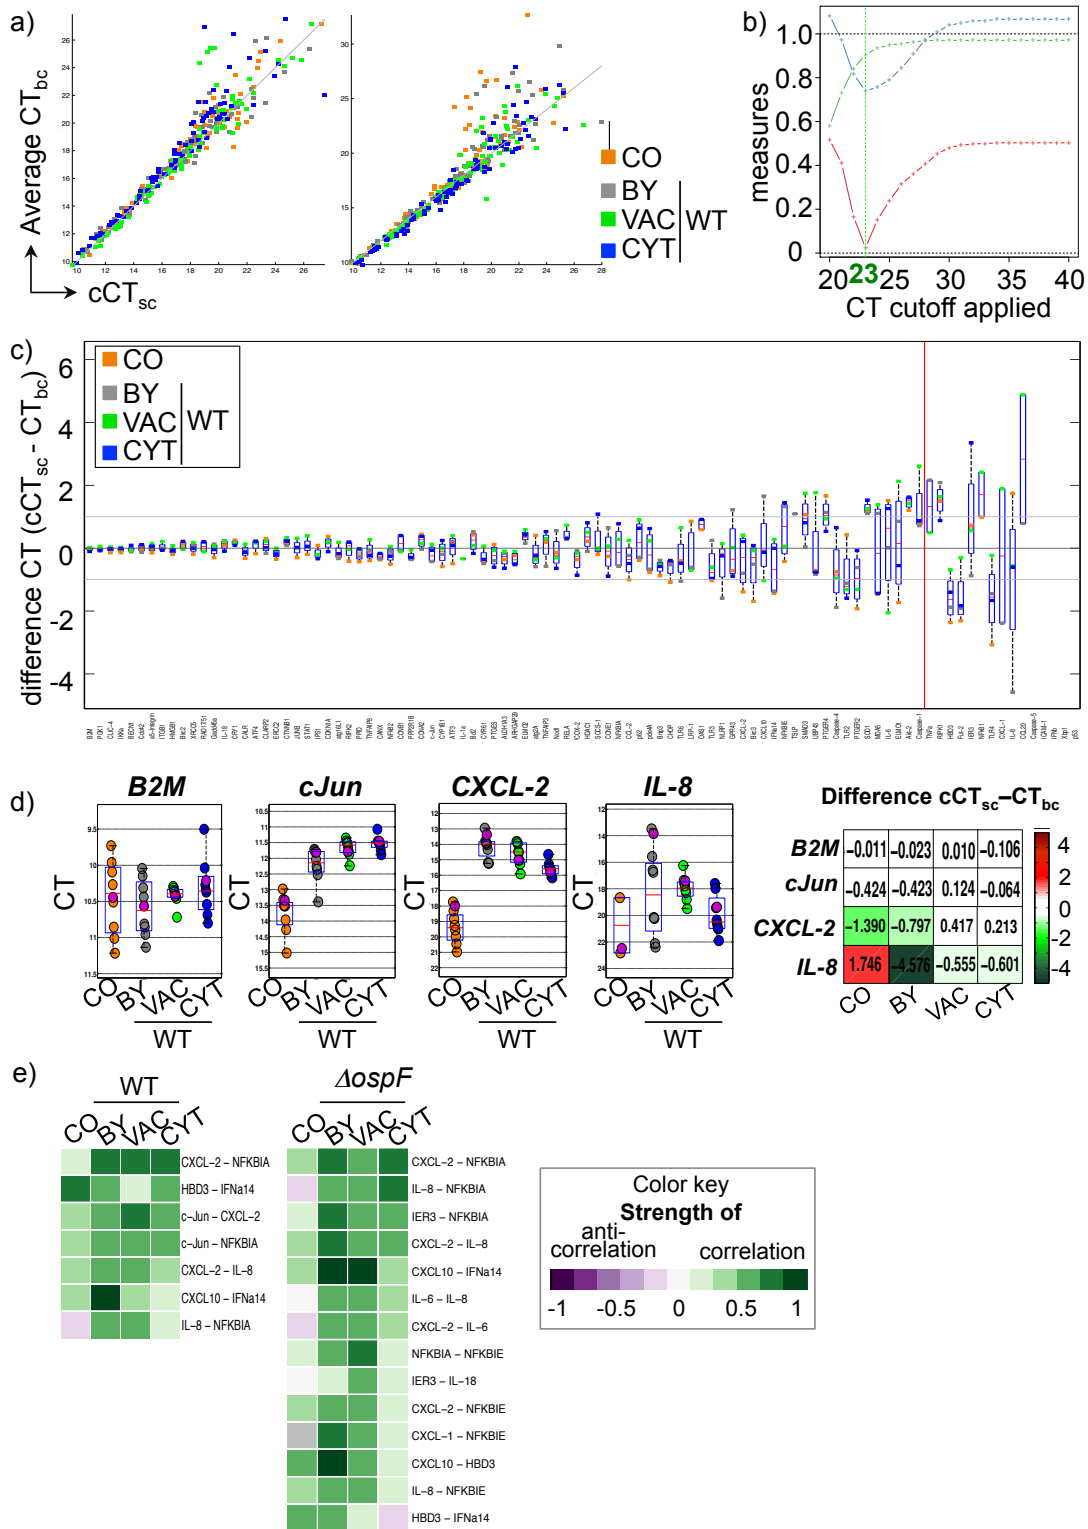

308

309 **Figure S7 (relates to Fig. 5) Establishment of a robust protocol for single cell**  
 310 **transcriptional analysis**

311 a) Scatter plots depict concordance of single and bulk cell measurements of two  
 312 independent experiments before a CT cutoff has been applied. Cumulative  $CT_{sc}$

313 (cCT<sub>sc</sub>) and the average CT<sub>bc</sub> for indicated stages of bacterial infection or uninfected  
314 control cells are shown. Note the high concordance of data with CTs below 23.

315 b) Definition of the CT cutoff at 23. For a range of CT<sub>max</sub> cutoffs the absolute mean  
316 difference between CT<sub>bc</sub> and cCT<sub>sc</sub> (red line), the average RMSD (blue line) and the  
317 ratio of retained valid measurements after applying indicated cutoffs (green line) were  
318 plotted, which revealed that a CT<sub>max</sub> of 23 leads to a globally optimal concordance.

319 c) Box plots show the differences between cCT<sub>sc</sub> and CT<sub>bc</sub> on a per-gene basis for all  
320 indicated infection stages. The average difference of CTs between single cell and bulk  
321 cell measurements is plotted for the 96 measured genes. Grey lines indicate the  
322 deviation of +/-1 CT from absolute concordance (black line). The red line indicates  
323 for which genes the RMSD between cCT<sub>sc</sub> and CT<sub>bc</sub> are above 1.5.

324 d) Box plots display CT<sub>bc</sub> values. cCT<sub>sc</sub> (pink dots) for indicated genes are overlaid on  
325 their corresponding bulk cell measurements. The table shows the difference between  
326 cCT<sub>sc</sub> and CT<sub>bc</sub>. Coloring indicates whether cCT<sub>sc</sub> over- (green) or underestimates the  
327 expression measured in bulk cells (red).

328 e) Heat maps show Spearman correlation coefficients (positive correlation: green,  
329 anti-correlation: purple) between indicated pairs of inflammatory genes. Correlations  
330 within uninfected control cells (CO) or within cells at indicated stages of WT- (left)  
331 and *ΔospF*-infected cells (right) are shown. All gene pairs with at least one significant  
332 correlation ( $p_{\text{comb}} < 0.01$ ) within the tested conditions are shown.

333

334

**Table S1 (relates to Fig. 1) List of gene expression assays used for HeLa and Caco-2 cells with annotations manually assigned based on information retrieved from Pubmed, IPA and the literature**

|    | accession number | Gene name     | Annotation 1     | Annotation 2         | Annotation 3         | Annotation 4         |
|----|------------------|---------------|------------------|----------------------|----------------------|----------------------|
| 1  | NM_000291        | <b>PGK1</b>   | reference gene   |                      |                      |                      |
| 2  | NM_000994        | <b>B2M</b>    | reference gene   |                      |                      |                      |
| 3  | NM_000034        | <b>SDHA</b>   | reference gene   |                      |                      |                      |
| 4  | NM_001101        | <b>GAPDH</b>  | reference gene   |                      |                      |                      |
| 5  | NM_002046        | <b>LDHA</b>   | reference gene   |                      |                      |                      |
| 6  | NM_005566        | <b>ALDOA</b>  | reference gene   |                      |                      |                      |
| 7  | NM_002954        | <b>RPS27A</b> | reference gene   |                      |                      |                      |
| 8  | NM_022551        | <b>ACTB</b>   | reference gene   |                      |                      |                      |
| 9  | NM_004048        | <b>UBC</b>    | reference gene   |                      |                      |                      |
| 10 | NM_004168        | <b>RPL32</b>  | reference gene   |                      |                      |                      |
| 11 | NM_021009        | <b>RPS18</b>  | reference gene   |                      |                      |                      |
| 12 | NM_003998        | <b>NFkB1</b>  | apoptosis        | inflammation         | PRR signaling        | Transcription factor |
| 13 | NM_002229        | <b>JUNB</b>   | apoptosis        | cell cycle           | Transcription factor |                      |
| 14 | NM_002228        | <b>c-Jun</b>  | inflammation     | apoptosis            | stress response      | Transcription factor |
| 15 | NM_002502        | <b>NFkB2</b>  | inflammation     | Transcription factor |                      |                      |
| 16 | NM_020529        | <b>NFKBIA</b> | inflammation     | PRR signaling        | apoptosis            | Transcription factor |
| 17 | NM_004556        | <b>NFKBIE</b> | inflammation     | Transcription factor |                      |                      |
| 18 | NM_004083        | <b>CHOP</b>   | ER-stress        | UPR                  | apoptosis            | Transcription factor |
| 19 | NM_001674        | <b>ATF3</b>   | ER-stress        | AA starvation        | UPR                  | Transcription factor |
| 20 | NM_182810        | <b>ATF4</b>   | ER-stress        | UPR                  | Transcription factor |                      |
| 21 | NM_005080        | <b>Xbp1</b>   | ER-stress        | UPR                  | Transcription factor |                      |
| 22 | NM_003804        | <b>RIPK1</b>  | PRR signaling    | apoptosis            | stress response      |                      |
| 23 | NM_020746        | <b>IPS1</b>   | PRR signaling    | IFN signaling        |                      |                      |
| 24 | NM_003821        | <b>RIPK2</b>  | PRR signaling    | inflammation         |                      |                      |
| 25 | NM_001278        | <b>IKKa</b>   | PRR signaling    |                      |                      |                      |
| 26 | NM_001033053     | <b>NLRP1</b>  | PRR signaling    | apoptosis            |                      |                      |
| 27 | NM_006092        | <b>Nod1</b>   | PRR              | PRR cytosol          | apoptosis            | inflammation         |
| 28 | NM_022168        | <b>MDA5</b>   | PRR              | PRR cytosol          | DNA repair           | apoptosis            |
| 29 | NM_003264        | <b>TLR2</b>   | PRR              | PRR membrane         |                      |                      |
| 30 | NM_138554        | <b>TLR4</b>   | PRR              | PRR membrane         |                      |                      |
| 31 | NM_003265        | <b>TLR3</b>   | PRR              | PRR membrane         |                      |                      |
| 32 | NM_006068        | <b>TLR6</b>   | PRR              | PRR membrane         |                      |                      |
| 33 | NM_000584        | <b>IL-8</b>   | pro-inflammation | cyto-/chemokines     |                      |                      |
| 34 | NM_000594        | <b>TNFa</b>   | pro-inflammation | cyto-/chemokines     | apoptosis            |                      |

**Table S1 (continued)**

|    |              |                   |                       |                             |                         |               |
|----|--------------|-------------------|-----------------------|-----------------------------|-------------------------|---------------|
| 35 | NM_002172    | <b>IFNa14</b>     | pro-inflammation      | cyto-<br>/chemokines        |                         |               |
| 36 | NM_002176    | <b>IFNb</b>       | pro-inflammation      | cyto-<br>/chemokines        | apoptosis               |               |
| 37 | NM_000600    | <b>IL-6</b>       | pro-inflammation      | cyto-<br>/chemokines        |                         |               |
| 38 | NM_018661    | <b>HBD3</b>       | pro-inflammation      | cyto-<br>/chemokines        | AMP                     |               |
| 39 | NM_002982    | <b>CCL2</b>       | pro-inflammation      | cyto-<br>/chemokines        |                         |               |
| 40 | NM_001130046 | <b>CCL20</b>      | pro-inflammation      | cyto-<br>/chemokines        |                         |               |
| 41 | NM_001511    | <b>CXCL-1</b>     | pro-inflammation      | cyto-<br>/chemokines        |                         |               |
| 42 | NM_002089    | <b>CXCL-2</b>     | pro-inflammation      | cyto-<br>/chemokines        |                         |               |
| 43 | NM_000575    | <b>IL-1a</b>      | pro-inflammation      | cyto-<br>/chemokines        | cell cycle              | apoptosis     |
| 44 | NM_001562    | <b>IL-18</b>      | pro-inflammation      | cyto-<br>/chemokines        |                         |               |
| 45 | NM_001565    | <b>CXCL10</b>     | pro-inflammation      | cyto-<br>/chemokines        |                         |               |
| 46 | NM_000963    | <b>COX-2</b>      | inflammation          | lipid<br>metabolism         | apoptosis               |               |
| 47 | NM_138937    | <b>RegIIIbeta</b> | inflammation          | adhesion                    | acute phase<br>response |               |
| 48 | NM_002128    | <b>HMGB1</b>      | inflammation          | apoptosis                   | DNA repair              |               |
| 49 | NM_0033292   | <b>Caspase-1</b>  | inflammation          | pyroptosis                  | inflammasome<br>act.    |               |
| 50 | NM_001225    | <b>Caspase-4</b>  | inflammation          | pyroptosis                  | inflammasome<br>act.    | ER-stress     |
| 51 | NM_004347    | <b>Caspase-5</b>  | inflammation          | pyroptosis                  | inflammasome<br>act.    |               |
| 52 | NM_006290    | <b>TNFAIP3</b>    | anti-<br>inflammation | apoptosis                   | UPR                     | PRR signaling |
| 53 | NM_139266    | <b>STAT1</b>      | IFN signaling         | apoptosis                   |                         |               |
| 54 | NM_003745    | <b>SOCS-1</b>     | IFN signaling         | metabolism                  |                         |               |
| 55 | NM_017414    | <b>UBP43</b>      | IFN signaling         |                             |                         |               |
| 56 | NM_002534    | <b>OAS1</b>       | IFN signaling         |                             |                         |               |
| 57 | NM_005038    | <b>PPID</b>       | heat shock<br>resp.   | protein<br>folding          |                         |               |
| 58 | NM_004343    | <b>CALR</b>       | cytoskeleton          | ER-stress                   | cell cycle              |               |
| 59 | NM_001746    | <b>CANX</b>       | cytoskeleton          | ER-stress                   | protein<br>transport    |               |
| 60 | NM_000400    | <b>ERCC2</b>      | DNA repair            | cell cycle                  | apoptosis               |               |
| 61 | NM_002873    | <b>RAD17/51</b>   | DNA repair            | cell cycle                  |                         |               |
| 62 | NM_004075    | <b>CRY1</b>       | DNA repair            |                             |                         |               |
| 63 | NM_000693    | <b>ALDH1A3</b>    | detoxification        | apoptosis                   |                         |               |
| 64 | NM_000499    | <b>CYP1A1</b>     | detoxification        | cell cycle                  | S phase reg             |               |
| 65 | NM_000104    | <b>CYP1B1</b>     | detoxification        |                             |                         |               |
| 66 | NM_000454    | <b>SOD1</b>       | detoxification        |                             |                         |               |
| 67 | NM_013943    | <b>CLIC-4</b>     | cell cycle            | cytoskeleton                | IFN signaling           |               |
| 68 | NM_001904    | <b>CTNNB1</b>     | cytoskeleton          | cell cycle                  |                         |               |
| 69 | NM_001791    | <b>Cdc42</b>      | cytoskeleton          |                             |                         |               |
| 70 | NM_078467    | <b>CDKN1A</b>     | cell cycle            | cell cycle<br>progression   | apoptosis               |               |
| 71 | NM_181699    | <b>PPP2R1B</b>    | cell cycle            | cell cycle<br>progression   |                         |               |
| 72 | NM_001238    | <b>CCNE1</b>      | cell cycle            | G1/S<br>transition, S       | DNA repair              |               |
| 73 | NM_031966    | <b>CCNB1</b>      | cell cycle            | G2/M<br>transition, M       |                         |               |
| 74 | NM_001237    | <b>CCNA2</b>      | cell cycle            | G2/M<br>transition,<br>S/G2 |                         |               |
| 75 | NM_017974    | <b>Atg16L1</b>    | autophagy             | starvation                  | stress<br>response      |               |
| 76 | NM_015104    | <b>Atg2A</b>      | autophagy             |                             |                         |               |



**Table S1 (continued)**

|     |           |                                      |                       |                        |                    |
|-----|-----------|--------------------------------------|-----------------------|------------------------|--------------------|
| 77  | NM_004964 | <b>HDAC1</b>                         | apoptosis             | anti-inflammation      | cell cycle         |
| 78  | NM_001924 | <b>Gadd45a</b>                       | apoptosis             | cell cycle             | G2/M transition    |
| 79  | NM_005902 | <b>SMAD3</b>                         | apoptosis             | cell cycle             |                    |
| 80  | NM_000546 | <b>p53</b>                           | apoptosis             | cell cycle             | DNA repair         |
| 81  | NM_133171 | <b>ELMO2</b>                         | apoptosis             | cytoskeleton           | endocytosis        |
| 82  | NM_014800 | <b>ELMO1</b>                         | apoptosis             | cytoskeleton           | endocytosis        |
| 83  | NM_021141 | <b>XRCC5</b>                         | DNA repair            | apoptosis              |                    |
| 84  | NM_003897 | <b>IER3</b>                          | apoptosis             | immed. early response  |                    |
| 85  | NM_001626 | <b>Akt-2</b>                         | apoptosis             | lipid metabolism       |                    |
| 86  | NM_004052 | <b>Bnip3</b>                         | apoptosis             |                        |                    |
| 87  | NM_021975 | <b>RELA</b>                          | apoptosis             |                        |                    |
| 88  | NM_005306 | <b>GPR43</b>                         | inflammation          | lipid metabolism       |                    |
| 89  | NM_014350 | <b>TNFAIP8</b>                       | apoptosis             |                        |                    |
| 90  | NM_003766 | <b>BECN1</b>                         | anti-apoptosis        | autophagy              | stress response    |
| 91  | NM_000633 | <b>Bcl2</b>                          | anti-apoptosis        | cell cycle             | G1/S transition    |
| 92  | NM_003879 | <b>CLARP2</b>                        | anti-apoptosis        |                        |                    |
| 93  | NM_001166 | <b>Birc2</b>                         | anti-apoptosis        |                        |                    |
| 94  | NM_001165 | <b>Birc3</b>                         | anti-apoptosis        |                        |                    |
| 95  | NM_001554 | <b>CYR61</b>                         | apoptosis             | adhesion               |                    |
| 96  | NM_033668 | <b>ITGB1</b>                         | adhesion              | cell cycle             | G1/S transition, S |
| 97  | NM_002205 | <b><math>\alpha</math>5-Integrin</b> | adhesion              | cell surface signaling |                    |
| 98  | NM_000201 | <b>ICAM-1</b>                        | adhesion              |                        |                    |
| 99  | NM_000956 | <b>PTGER2</b>                        | lipid metabolism      |                        |                    |
| 100 | NM_000958 | <b>PTGER4</b>                        | lipid metabolism      |                        |                    |
| 101 | NM_004878 | <b>PTGES</b>                         | lipid metabolism      |                        |                    |
| 102 | NM_002332 | <b>LRP-1</b>                         | lipid metabolism      |                        |                    |
| 103 | NM_000511 | <b>Fut-2</b>                         | metabolism            | anti-apoptosis         |                    |
| 104 | NM_006202 | <b>Pde4A</b>                         | membrane ruffle       |                        |                    |
| 105 | NM_004815 | <b>ARHGAP29</b>                      | GTPase-act. protein   |                        |                    |
| 106 | NM_138551 | <b>TSLP</b>                          | commensal interaction |                        |                    |

**Additional gene expression assays used for analysis of Caco-2 cells**

|     |           |                   |                  |                  |  |
|-----|-----------|-------------------|------------------|------------------|--|
| 107 | NM_000291 | <b>PGK1</b>       | reference gene   |                  |  |
| 108 | NM_005566 | <b>ALDOA</b>      | reference gene   |                  |  |
| 109 | NM_000619 | <b>IFNg</b>       | pro-inflammation | cyto-/chemokines |  |
| 110 | NM_000882 | <b>IL12A</b>      | pro-inflammation | cyto-/chemokines |  |
| 111 | NM_000585 | <b>IL-15 v1/2</b> | pro-inflammation | cyto-/chemokines |  |
| 112 | NM_172138 | <b>IL28A</b>      | pro-inflammation | cyto-/chemokines |  |
| 113 | NM_172140 | <b>IL29</b>       | pro-inflammation | cyto-/chemokines |  |
| 114 | NM_080389 | <b>DEFB4A</b>     | pro-inflammation | cyto-/chemokines |  |
| 115 | NM_002982 | <b>CCL2</b>       | pro-inflammation | cyto-/chemokines |  |
| 116 | NM_003965 | <b>CCRL2</b>      | pro-inflammation |                  |  |
| 117 | NM_000064 | <b>C3</b>         | pro-inflammation | complement       |  |

**Table S1 (continued)**

|     |           |                      |                                     |            |
|-----|-----------|----------------------|-------------------------------------|------------|
| 118 | NM_001710 | <b><i>CFB</i></b>    | pro-<br>inflammation                | complement |
| 119 | NM_001879 | <b><i>MASP1</i></b>  | pro-<br>inflammation                |            |
| 120 | NM_000625 | <b><i>NOS2</i></b>   | antimicrobial<br>activities         |            |
| 121 | NM_007052 | <b><i>Nox1</i></b>   | pro-<br>inflammation                |            |
| 122 | NM_016931 | <b><i>Nox4</i></b>   | pro-<br>inflammation                |            |
| 123 | NM_001041 | <b><i>SI</i></b>     | differentiation<br>marker           |            |
| 124 | NM_005985 | <b><i>SNAI1</i></b>  | cell-cell<br>junction<br>regulation |            |
| 125 | NM_020384 | <b><i>CLDN2</i></b>  | tight junction                      |            |
| 126 | NM_001306 | <b><i>CLDN3</i></b>  | tight junction                      |            |
| 127 | NM_001305 | <b><i>CLDN4</i></b>  | tight junction                      |            |
| 128 | NM_003277 | <b><i>CLDN5</i></b>  | tight junction                      |            |
| 129 | NM_001307 | <b><i>CLDN7</i></b>  | tight junction                      |            |
| 130 | NM_006984 | <b><i>CLDN10</i></b> | tight junction                      |            |

335

336

337 **Table S2 (relates to Fig. 1c) Raw data:  $\Delta$ CT values calculated from median**  
 338 **average CT values and standard deviations from the 42 gene expression**  
 339 **signatures which were identified to be significantly differentially regulated upon**  
 340 **at least one of the indicated stages of WT *Shigella* infection of HeLa cells**  
 341

|                  | dCT values (median) |       |       |       | standard deviation |      |      |      |
|------------------|---------------------|-------|-------|-------|--------------------|------|------|------|
|                  | CO                  | BY    | VAC   | CYT   | CO                 | BY   | VAC  | CYT  |
| <i>NFKBIA</i>    | 6.91                | 3.84  | 3.66  | 4.22  | 0.39               | 0.69 | 0.21 | 0.19 |
| <i>CXCL-2</i>    | 8.63                | 2.97  | 3.60  | 4.53  | 1.29               | 1.04 | 0.79 | 0.58 |
| <i>IL-8</i>      | 12.75               | 7.25  | 7.02  | 9.45  | 2.95               | 3.54 | 1.05 | 1.66 |
| <i>NFKBIE</i>    | 8.71                | 7.80  | 7.84  | 8.36  | 0.69               | 0.30 | 0.91 | 0.62 |
| <i>NFKB1</i>     | 10.30               | 9.25  | 9.20  | 9.50  | 1.06               | 0.46 | 0.10 | 0.53 |
| <i>TLR4</i>      | 9.91                | 7.49  | 8.26  | 10.14 | 4.13               | 3.92 | 1.13 | 3.40 |
| <i>IL-6</i>      | 12.02               | 10.03 | 10.49 | 9.93  | 0.89               | 1.41 | 0.81 | 1.08 |
| <i>JUNB</i>      | 2.93                | 1.19  | 1.84  | 2.29  | 0.64               | 0.65 | 0.43 | 0.34 |
| <i>ERCC2</i>     | 6.12                | 5.76  | 5.90  | 5.86  | 0.42               | 0.37 | 0.44 | 0.56 |
| <i>IER3</i>      | 9.97                | 8.04  | 8.72  | 9.42  | 1.64               | 1.19 | 0.37 | 0.68 |
| <i>ATF4</i>      | 1.81                | 1.35  | 1.57  | 1.72  | 0.26               | 0.33 | 0.32 | 0.24 |
| <i>CDKN1A</i>    | 4.81                | 4.11  | 4.47  | 4.75  | 0.60               | 0.48 | 0.41 | 0.53 |
| <i>COX-2</i>     | 7.83                | 6.04  | 7.20  | 7.82  | 0.66               | 0.73 | 0.70 | 0.49 |
| <i>GPR43</i>     | 8.37                | 7.98  | 12.14 | 11.85 | 2.07               | 3.62 | 3.53 | 3.36 |
| <i>IL-18</i>     | 2.05                | 1.80  | 1.61  | 1.56  | 0.23               | 0.40 | 0.22 | 0.32 |
| <i>ATF3</i>      | 3.28                | 2.44  | 2.12  | 2.19  | 0.58               | 0.57 | 0.17 | 0.27 |
| <i>Birc2</i>     | 5.66                | 5.41  | 5.26  | 5.19  | 0.16               | 0.54 | 0.30 | 0.29 |
| <i>Birc3</i>     | 8.45                | 6.44  | 5.70  | 6.04  | 1.21               | 1.21 | 0.67 | 0.34 |
| <i>CYR61</i>     | 2.77                | 1.64  | 0.77  | 0.74  | 0.89               | 0.80 | 0.80 | 0.41 |
| <i>TNFAIP3</i>   | 5.86                | 2.16  | 1.55  | 2.05  | 0.46               | 1.00 | 0.47 | 0.32 |
| <i>CCL-2</i>     | 6.63                | 5.63  | 5.33  | 5.76  | 0.78               | 0.99 | 0.75 | 0.93 |
| <i>HDAC1</i>     | 7.27                | 7.04  | 6.89  | 7.00  | 0.54               | 0.31 | 0.43 | 0.33 |
| <i>PPID</i>      | 3.65                | 3.44  | 3.23  | 3.39  | 0.25               | 0.25 | 0.26 | 0.21 |
| <i>TNFAIP8</i>   | 2.57                | 1.83  | 1.56  | 1.91  | 0.29               | 0.45 | 0.37 | 0.30 |
| <i>CLIC-4</i>    | 0.77                | 0.59  | 0.46  | 0.57  | 0.17               | 0.39 | 0.18 | 0.10 |
| <i>HMGB1</i>     | 0.67                | 0.61  | 0.39  | 0.69  | 0.23               | 0.14 | 0.18 | 0.20 |
| <i>CYP1B1</i>    | 3.40                | 3.37  | 3.20  | 3.93  | 0.57               | 0.22 | 0.32 | 0.43 |
| <i>Xbp1</i>      | 14.06               | 14.03 | 13.68 | 15.30 | 1.04               | 0.86 | 0.81 | 1.29 |
| <i>STAT1</i>     | 5.71                | 5.66  | 5.49  | 5.89  | 0.28               | 0.36 | 0.23 | 0.21 |
| <i>c-Jun</i>     | 3.04                | 0.92  | 0.78  | 0.58  | 0.55               | 0.84 | 0.22 | 0.30 |
| <i>RELA</i>      | 8.44                | 7.90  | 7.97  | 7.79  | 0.37               | 0.81 | 0.36 | 0.56 |
| <i>RIPK2</i>     | 5.80                | 5.25  | 5.20  | 5.09  | 0.22               | 0.51 | 0.27 | 0.25 |
| <i>BECN1</i>     | 3.64                | 3.48  | 3.36  | 3.25  | 0.35               | 0.31 | 0.25 | 0.15 |
| <i>Cdc42</i>     | 1.00                | 0.87  | 0.82  | 0.70  | 0.24               | 0.29 | 0.17 | 0.10 |
| <i>Gadd45a</i>   | 6.13                | 4.83  | 4.15  | 3.52  | 0.46               | 0.78 | 1.00 | 0.93 |
| <i>NLRP1</i>     | 8.88                | 9.59  | 9.64  | 9.89  | 0.82               | 1.05 | 1.03 | 1.43 |
| <i>CTNBN1</i>    | 3.62                | 3.74  | 3.71  | 3.93  | 0.25               | 0.29 | 0.20 | 0.13 |
| <i>Caspase-4</i> | 8.17                | 8.22  | 8.41  | 7.82  | 0.58               | 1.15 | 0.80 | 0.44 |
| <i>XRCC5</i>     | 0.10                | 0.00  | -0.28 | -0.18 | 0.25               | 0.43 | 0.28 | 0.13 |
| <i>ELMO2</i>     | 7.26                | 7.33  | 6.63  | 6.65  | 0.18               | 0.64 | 0.31 | 0.27 |
| <i>CLARP2</i>    | 6.13                | 6.12  | 5.67  | 5.93  | 0.28               | 0.68 | 0.50 | 0.31 |

343 **Table S3 (relates to Fig. S4f) Raw data:  $\Delta$ CT values calculated from median**  
 344 **average CT values and standard deviations from gene expression signatures**  
 345 **which were identified to be significantly differentially regulated upon at least one**  
 346 **of the indicated stages of WT *Shigella*-activated gene expression signatures of**  
 347 **Caco-2 cells**

|                 | dCT (median) |       |       |       | standard deviation |      |      |      |
|-----------------|--------------|-------|-------|-------|--------------------|------|------|------|
|                 | CO           | BY    | VAC   | CYT   | CO                 | BY   | VAC  | CYT  |
| <i>Xbp1</i>     | 8.51         | 7.96  | 8.09  | 9.37  | 1.01               | 1.24 | 1.06 | 0.70 |
| <i>ATF3</i>     | 1.09         | 0.05  | 0.72  | 0.45  | 1.19               | 1.19 | 0.88 | 1.17 |
| <i>ATF4</i>     | 0.16         | -0.18 | -0.51 | -0.84 | 0.54               | 0.55 | 0.49 | 0.47 |
| <i>Birc2</i>    | 1.05         | 0.75  | 0.91  | 0.47  | 0.57               | 0.80 | 0.78 | 0.69 |
| <i>CALR</i>     | -0.54        | 0.00  | -0.96 | -1.20 | 0.50               | 1.45 | 1.02 | 0.86 |
| <i>CCNA2</i>    | 2.91         | 1.69  | 0.82  | 0.48  | 1.69               | 1.92 | 1.14 | 1.02 |
| <i>CCNB1</i>    | 1.69         | 0.92  | -0.12 | -1.39 | 1.68               | 4.54 | 1.86 | 1.62 |
| <i>CCND2</i>    | 7.18         | 7.31  | 6.81  | 6.61  | 1.54               | 2.25 | 1.03 | 1.15 |
| <i>CCNE1</i>    | 8.89         | 8.96  | 7.48  | 7.33  | 1.84               | 2.48 | 1.54 | 0.93 |
| <i>CLIC-4</i>   | -0.04        | -0.13 | -0.50 | -1.21 | 0.76               | 1.12 | 0.78 | 0.70 |
| <i>CYR61</i>    | 2.61         | 3.19  | 0.45  | -0.04 | 1.04               | 1.14 | 0.81 | 0.67 |
| <i>ERCC2</i>    | 5.14         | 5.26  | 4.20  | 4.23  | 1.65               | 0.88 | 0.46 | 0.71 |
| <i>IKKa</i>     | 4.33         | 4.62  | 3.41  | 3.48  | 0.71               | 0.59 | 0.52 | 0.69 |
| <i>IPS1</i>     | 2.70         | 3.18  | 2.00  | 1.97  | 0.85               | 1.00 | 0.56 | 0.38 |
| <i>NFKBIA</i>   | 2.77         | 2.85  | 2.07  | 1.54  | 0.82               | 0.63 | 0.54 | 0.60 |
| <i>NFKBIE</i>   | 4.01         | 3.35  | 2.94  | 3.25  | 0.93               | 0.68 | 0.68 | 0.52 |
| <i>NFkB1</i>    | 7.40         | 8.30  | 6.57  | 6.74  | 0.98               | 1.52 | 0.87 | 0.68 |
| <i>PPID</i>     | 2.66         | 4.68  | 3.01  | 3.21  | 0.98               | 2.61 | 1.62 | 1.65 |
| <i>PPP2R1B</i>  | 3.19         | 7.21  | 3.94  | 3.41  | 0.59               | 2.50 | 1.86 | 1.94 |
| <i>RAD17/51</i> | 0.96         | 1.45  | 1.00  | 0.70  | 0.59               | 0.92 | 0.60 | 0.56 |
| <i>RELA</i>     | 6.96         | 6.30  | 6.00  | 5.92  | 1.71               | 0.88 | 0.78 | 0.67 |
| <i>RIPK2</i>    | 2.82         | 2.55  | 2.14  | 1.64  | 0.74               | 0.52 | 0.64 | 0.49 |
| <i>SNAI1</i>    | 7.22         | 5.82  | 5.73  | 5.32  | 1.23               | 2.24 | 0.83 | 0.67 |
| <i>XRCC5</i>    | -0.08        | -0.41 | -1.38 | -1.80 | 0.68               | 0.82 | 0.56 | 0.43 |
| <i>c-Jun</i>    | -2.29        | -3.30 | -2.91 | -3.38 | 0.81               | 0.67 | 0.67 | 0.39 |
| <i>BECN1</i>    | 1.17         | 1.68  | 1.56  | 0.96  | 1.03               | 1.58 | 1.13 | 0.77 |
| <i>CANX</i>     | -1.35        | -0.64 | -1.79 | -1.88 | 1.09               | 1.19 | 1.00 | 1.18 |
| <i>CFB</i>      | 4.42         | 4.77  | 4.23  | 4.53  | 0.84               | 1.11 | 0.99 | 0.77 |
| <i>COX-2</i>    | 5.90         | 7.50  | 5.53  | 5.02  | 2.12               | 2.00 | 1.28 | 0.74 |
| <i>CXCL-2</i>   | 1.64         | 1.27  | 0.83  | 1.87  | 1.76               | 1.05 | 1.18 | 0.88 |
| <i>RIPK1</i>    | 4.11         | 3.75  | 3.80  | 3.60  | 0.79               | 0.56 | 0.53 | 0.50 |
| <i>TNFAIP8</i>  | 0.47         | 0.90  | 0.34  | 0.22  | 0.53               | 1.08 | 0.56 | 0.46 |
| <i>UBP43</i>    | 3.68         | 5.13  | 3.78  | 3.74  | 0.88               | 3.64 | 1.87 | 1.35 |
| <i>atg16L1</i>  | 3.17         | 3.87  | 3.28  | 2.94  | 0.63               | 1.59 | 0.85 | 0.79 |
| <i>IL-1a</i>    | 8.09         | 7.24  | 7.71  | 7.75  | 1.94               | 2.84 | 1.25 | 0.81 |
| <i>CLDN4</i>    | 2.66         | 4.45  | 4.66  | 4.80  | 0.88               | 2.69 | 1.77 | 1.82 |
| <i>Birc3</i>    | 3.17         | 5.51  | 5.42  | 5.04  | 1.38               | 5.16 | 3.74 | 3.31 |
| <i>Fut2</i>     | 3.78         | 5.17  | 5.74  | 6.63  | 2.14               | 5.29 | 5.30 | 4.13 |
| <i>Nod1</i>     | 8.16         | 14.63 | 8.62  | 9.23  | 1.06               | 4.38 | 4.20 | 2.78 |
| <i>CCRL2</i>    | 4.82         | 6.29  | 7.23  | 7.61  | 2.07               | 2.04 | 2.65 | 2.51 |
| <i>CDKN1A</i>   | 4.16         | 3.35  | 5.05  | 5.19  | 1.24               | 5.34 | 3.94 | 3.62 |
| <i>CXCL10</i>   | 8.38         | 10.05 | 12.79 | 12.98 | 3.38               | 6.14 | 4.22 | 4.54 |

**Table S3 (continued)**

|                           |       |       |       |       |      |      |      |      |
|---------------------------|-------|-------|-------|-------|------|------|------|------|
| <b><i>CYP1B1</i></b>      | 4.81  | 8.32  | 9.03  | 7.21  | 1.74 | 4.52 | 4.10 | 2.96 |
| <b><i>HBD3</i></b>        | 4.65  | 6.20  | 9.86  | 7.67  | 1.52 | 3.85 | 3.43 | 2.50 |
| <b><i>IFNa14</i></b>      | 5.26  | 6.62  | 9.09  | 11.06 | 1.23 | 4.14 | 3.87 | 3.31 |
| <b><i>IFNb</i></b>        | 9.70  | 10.63 | 18.76 | 13.97 | 2.98 | 3.38 | 5.01 | 4.48 |
| <b><i>PTGER2</i></b>      | 6.41  | 13.12 | 13.52 | 14.21 | 1.69 | 2.77 | 1.10 | 1.18 |
| <b><i>TLR2</i></b>        | 3.63  | 4.01  | 6.90  | 5.41  | 1.19 | 2.53 | 1.74 | 1.95 |
| <b><i>TLR4</i></b>        | 3.89  | 6.30  | 9.31  | 7.13  | 1.17 | 2.97 | 2.96 | 2.85 |
| <b><i>TLR6</i></b>        | 5.73  | 6.58  | 8.48  | 8.70  | 2.13 | 1.68 | 2.46 | 2.71 |
| <b><i>CLARP2</i></b>      | 1.51  | 1.43  | 2.02  | 2.34  | 1.18 | 0.62 | 0.87 | 0.36 |
| <b><i>p62</i></b>         | 7.74  | 7.51  | 7.95  | 8.76  | 1.04 | 0.60 | 0.25 | 0.42 |
| <b><i>C3</i></b>          | 9.91  | 14.15 | 11.65 | 13.07 | 1.74 | 3.57 | 3.52 | 3.33 |
| <b><i>CLDN3</i></b>       | 5.80  | 6.74  | 7.03  | 7.14  | 2.17 | 2.27 | 1.66 | 1.13 |
| <b><i>TLR3</i></b>        | 6.37  | 6.07  | 7.57  | 9.52  | 2.57 | 1.35 | 1.61 | 3.22 |
| <b><i>Bnip3</i></b>       | 1.25  | 2.40  | 2.87  | 2.47  | 0.78 | 0.98 | 0.65 | 0.67 |
| <b><i>a5-Integrin</i></b> | 2.97  | 2.93  | 4.10  | 3.58  | 1.02 | 0.74 | 0.59 | 0.35 |
| <b><i>CHOP</i></b>        | -0.03 | -0.40 | 0.44  | 0.53  | 1.42 | 0.86 | 1.56 | 0.69 |
| <b><i>CLDN5</i></b>       | 8.29  | 8.27  | 9.17  | 9.34  | 2.16 | 1.82 | 1.05 | 3.30 |
| <b><i>JUNB</i></b>        | 1.89  | 1.58  | 2.08  | 2.07  | 0.75 | 0.81 | 0.55 | 0.63 |
| <b><i>HMGB1</i></b>       | -0.04 | 2.31  | 0.97  | 0.91  | 2.49 | 3.44 | 1.87 | 1.66 |
| <b><i>NFkB2</i></b>       | 2.41  | 3.48  | 2.16  | 2.42  | 0.61 | 3.63 | 2.52 | 1.78 |
| <b><i>CCL2</i></b>        | 2.96  | 8.27  | 3.60  | 3.39  | 2.41 | 6.94 | 4.06 | 2.75 |

348

349

350

351 **Table S4 (relates to Fig. 2a-d) Raw data:  $\Delta$ CT values calculated from median**  
 352 **average CT values and standard deviations of activated ( $p \leq 0.05$ ,  $q \leq 0.25$ ) gene**  
 353 **expression signatures in bystander HeLa cells upon challenge with WT or**  
 354 **different mutant strains of *Shigella*.**

|                | dCT (median) |          |            |            |            |            | standard deviation |          |            |            |            |            |
|----------------|--------------|----------|------------|------------|------------|------------|--------------------|----------|------------|------------|------------|------------|
|                | CO           | BY<br>WT | BY<br>ospF | BY<br>ospG | BY<br>mxiE | BY<br>ipgD | CO                 | BY<br>WT | BY<br>ospF | BY<br>ospG | BY<br>mxiE | BY<br>ipgD |
| <i>IL-6</i>    | 11.94        | 10.03    | 9.69       | 11.27      | 9.98       | 10.58      | 0.97               | 1.41     | 2.18       | 1.82       | 1.09       | 2.55       |
| <i>IL-8</i>    | 12.60        | 7.25     | 5.47       | 5.42       | 7.08       | 6.93       | 2.62               | 3.54     | 2.42       | 2.40       | 2.35       | 3.41       |
| <i>NFKBIE</i>  | 8.79         | 7.80     | 7.91       | 8.03       | 7.78       | 8.29       | 0.62               | 0.30     | 0.69       | 0.44       | 0.39       | 0.69       |
| <i>CXCL-2</i>  | 8.70         | 2.97     | 2.85       | 4.01       | 3.80       | 3.84       | 1.18               | 1.04     | 1.62       | 1.69       | 1.05       | 1.88       |
| <i>COX-2</i>   | 7.76         | 6.04     | 5.97       | 6.80       | 5.92       | 6.38       | 0.61               | 0.73     | 1.05       | 0.96       | 0.93       | 1.07       |
| <i>NFKBIA</i>  | 6.92         | 3.84     | 3.98       | 4.25       | 3.97       | 3.81       | 0.38               | 0.69     | 1.08       | 1.38       | 0.68       | 0.82       |
| <i>TNFAIP3</i> | 6.15         | 2.16     | 2.06       | 2.59       | 2.00       | 2.31       | 0.46               | 1.00     | 1.34       | 2.07       | 0.60       | 1.30       |
| <i>RIPK2</i>   | 5.74         | 5.25     | 5.41       | 5.39       | 5.29       | 5.44       | 0.20               | 0.51     | 0.33       | 0.39       | 0.28       | 0.20       |
| <i>c-Jun</i>   | 3.05         | 0.92     | 0.80       | 1.06       | 1.40       | 1.02       | 0.51               | 0.84     | 0.74       | 0.55       | 0.78       | 0.73       |
| <i>IER3</i>    | 9.86         | 8.04     | 8.58       | 8.27       | 7.81       | 8.13       | 1.39               | 1.19     | 1.51       | 1.59       | 1.35       | 1.40       |
| <i>Birc3</i>   | 5.71         | 5.41     | 5.30       | 5.45       | 5.37       | 5.38       | 0.23               | 0.54     | 0.39       | 0.34       | 0.34       | 0.48       |
| <i>Gadd45a</i> | 6.11         | 4.83     | 4.98       | 5.02       | 4.98       | 4.58       | 0.44               | 0.78     | 1.25       | 0.77       | 0.93       | 1.04       |
| <i>JUNB</i>    | 2.90         | 1.19     | 1.19       | 1.65       | 1.56       | 1.57       | 0.67               | 0.65     | 0.94       | 1.07       | 0.85       | 0.87       |
| <i>TNFAIP8</i> | 2.57         | 1.83     | 1.95       | 2.13       | 1.81       | 1.94       | 0.30               | 0.45     | 0.41       | 0.30       | 0.20       | 0.40       |
| <i>CYR61</i>   | 2.50         | 1.64     | 0.38       | 2.17       | 1.23       | 0.52       | 0.74               | 0.80     | 0.95       | 1.49       | 1.54       | 1.18       |
| <i>ERCC2</i>   | 6.14         | 5.76     | 6.59       | 6.23       | 6.14       | 5.93       | 0.39               | 0.37     | 0.47       | 0.50       | 0.35       | 0.45       |
| <i>CDKN1A</i>  | 4.96         | 4.11     | 4.52       | 4.23       | 4.56       | 4.55       | 0.56               | 0.48     | 0.75       | 0.95       | 0.60       | 0.51       |
| <i>ATF3</i>    | 3.09         | 2.44     | 2.07       | 2.21       | 2.43       | 2.24       | 0.46               | 0.57     | 0.31       | 0.43       | 0.18       | 0.51       |
| <i>ATF4</i>    | 1.88         | 1.35     | 1.53       | 1.63       | 1.30       | 1.50       | 0.28               | 0.33     | 0.28       | 0.35       | 0.41       | 0.36       |
| <i>CLIC-4</i>  | 0.82         | 0.59     | 0.44       | 0.51       | 0.60       | 0.65       | 0.14               | 0.39     | 0.22       | 0.27       | 0.18       | 0.18       |

355

356 **Movie S1 (relates to Fig. 1b)** shows WT-induced transcriptional signatures at  
 357  $p \leq 0.005$

358 **Movie S2 (relates to Fig. S4a)** shows WT-induced transcriptional signatures, no  
 359 statistical cutoffs applied

360 **Movie S3 (relates to Fig. S4b)** shows WT-induced transcriptional signatures at  
 361  $p \leq 0.05$

362 **Movie S4 (relates to Fig. 2e, g and h)** shows occurrence (top) or absence (middle  
 363 and bottom) of p65 nuclear translocation after WT *Shigella* entry (top), upon  
 364 cytochalasin D treatment prior and during WT *Shigella* challenge (middle) or upon  
 365  $\Delta$ mxiD *Shigella* challenge (bottom).

366 **Movie S5 (relates to Fig. S6e)** shows WT- and  $\Delta ospF$  induced intracellular  
367 transcriptional signatures

368 **Movie S6 (relates to Fig. S6f)** shows WT- and  $\Delta ipgD$  induced intracellular  
369 transcriptional signatures

370 **Movie S7 (relates to Fig. S6g)** shows WT- and  $\Delta ospG$  induced intracellular  
371 transcriptional signatures

372 **Movie S8 (relates to Fig. S6h)** shows WT- and  $\Delta mxiE$  induced intracellular  
373 transcriptional signatures

374

375

376 **Supplemental References**

377

- 378 1. **Bustin SA, Benes V, Garson JA, Hellemans J, Huggett J, Kubista M,**  
379 **Mueller R, Nolan T, Pfaffl MW, Shipley GL, Vandesompele J, Wittwer**  
380 **CT.** 2009. The MIQE guidelines: minimum information for publication of  
381 quantitative real-time PCR experiments., vol 55, p 611-622.
- 382 2. **Andersen CL, Jensen JL, Ørntoft TF.** 2004. Normalization of real-time  
383 quantitative reverse transcription-PCR data: a model-based variance  
384 estimation approach to identify genes suited for normalization, applied to  
385 bladder and colon cancer data sets. *Cancer research* **64**:5245-5250.
- 386 3. **Raj A, Peskin CS, Tranchina D, Vargas DY, Tyagi S.** 2006. Stochastic  
387 mRNA Synthesis in Mammalian Cells. *PLoS Biology* **4**:e309.
- 388 4. **McDavid A, Finak G, Chattopadhyay PK, Dominguez M, Lamoreaux L,**  
389 **Ma SS, Roederer M, Gottardo R.** 2013. Data exploration, quality control  
390 and testing in single-cell qPCR-based gene expression experiments.  
391 *Bioinformatics* **29**:461-467.
- 392 5. **Wilks S.** 1938. The large-sample distribution of the likelihood ratio for testing  
393 composite hypotheses. *The Annals of Mathematical Statistics.*

394

395

396
